# Supplementary figures and images for: Synthesis of nano-ZSM-5 zeolite via a dry gel conversion crystallization process and its application in MTO reaction
Source: Royal Society of Chemistry journal article supplement (doi:10.1039/d1ce00162k), 2021-01-01

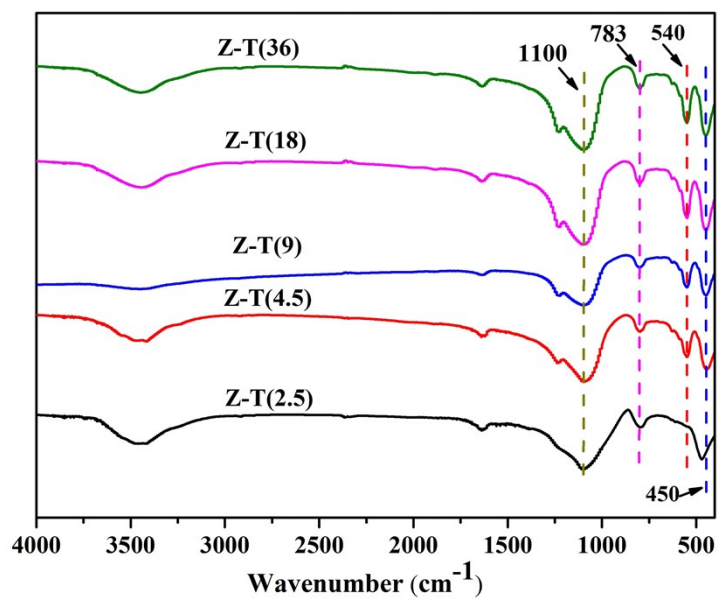

**Figure S1.** FTIR spectra of Z-T(2.5), Z-T(4.5), Z-T(9), Z-(18) and Z-T(36).

Supplement: d1ce00162k1.pdf [file d1ce00162k1.pdf]
